# Supplementary material
Source: PubMed Central journal article supplement (PMC6371056)

## **Supplementary Information**

### **Disruption of phospholipid and bile acid homeostasis in mice with nonalcoholic steatohepatitis**

Naoki Tanaka, Tsutomu Matsubara, Kristopher W. Krausz, Andrew D. Patterson, and Frank J. Gonzalez

**Supplementary table 1. Primer pairs used for qPCR**

| Gene    | GeneBank Accession Number |   | Primer Sequence (5'-3') |
|---------|---------------------------|---|-------------------------|
| 18S     | NR_003278                 | F | ATTGGAGCTGGAATTACCGC    |
|         |                           | R | CGGCTACCACATCCAAGGAA    |
| Abcb11  | NM_021022                 | F | CCAGAACATGACAAACGGAA    |
|         |                           | R | AAGGACAGCCACACCAACTC    |
| Abcc1   | NM_008576                 | F | GATGGCTCCGATCCACTCT     |
|         |                           | R | AGGTAGAAACAAGGCACCCA    |
| Abcc2   | NM_013806                 | F | TCCAGGACCAAGAGATTTGC    |
|         |                           | R | TCTGTGAGTGCAAGAGACAGGT  |
| Abcc4   | NM_009804                 | F | AGCTTCAACGGTACTGGGATA   |
|         |                           | R | TCGTCGGGGTCATACTTCTC    |
| Abcc5   | NM_013790                 | F | GCCCTGGGTACAGAAGTGAC    |
|         |                           | R | TCTTGGCATTCCAACGATCT    |
| Alox12  | NM_007440                 | F | GATCACTGAAGTGGGGCTGT    |
|         |                           | R | CACACATGGTGAGGAAATGG    |
| Alox12b | NM_009659                 | F | CTTCCCAGCTTACCAGTGGA    |
|         |                           | R | GGATAGGGAGTGTGTCGTCTG   |
| Alox15  | NM_009660                 | F | CGGTCTACTTGTCTCCCTGC    |
|         |                           | R | ATCCGCTTCAAACAGAGTGC    |
| Alox15b | NM_009661                 | F | CGCCAGAAGGAGCTTGAGT     |
|         |                           | R | TCACAGTCTCGTGGTCAAGG    |
| Cybb    | NM_007807                 | F | CTTTCTCAGGGTTCCAGTG     |
|         |                           | R | TGCAGTGCTATCATCCAAGC    |
| Cyp7a1  | NM_007824                 | F | GGGAATGCCATTTACTTGGA    |
|         |                           | R | GTCCGGATATCAAGGATGC     |
| Cyp8b1  | NM_010012                 | F | TCCTCAGGGTGGTACAGGAG    |
|         |                           | R | GATAGGGGAAGAGAGCCACC    |
| Cyp27a1 | NM_024264                 | F | CTATGTGCTGCACTTGCCC     |
|         |                           | R | GGGCACTAGCCAGATTCACA    |
| Egr1    | NM_007913                 | F | GAGCGAACAACCCTATGAGC    |
|         |                           | R | TGGGATAACTCGTCTCCACC    |
| Enpp2   | NM_015744                 | F | TCGAGGGCGAGAGAAGTTTA    |
|         |                           | R | AAAAGAATGTCCCGGCTCTC    |
| Il6     | NM_031168                 | F | TGATGCACTTGCAGAAAACA    |
|         |                           | R | ACCAGAGGAAATTTTCAATAGGC |
| Lcat    | NM_008490                 | F | GGTTTATCTCTCTCGGGGC     |
|         |                           | R | TATGTTGGACAGGATGGGGA    |
| Lpcat1  | NM_145376                 | F | CACGAGCTGCGACTGAGC      |
|         |                           | R | ATGAAAGCAGCGAACAGGAG    |
| Lpcat2  | NM_173014                 | F | ACCTGTTTCCGATGTCCTGA    |
|         |                           | R | CCAGGCCGATCACATACTCT    |
| Lpcat3  | NM_145130                 | F | AGCCTTAACAAGTTGGCGAC    |
|         |                           | R | ATGCCGGTAAAACAGAGCC     |
| Lpcat4  | NM_207206                 | F | GAGTTACACCTCTCCGGCCT    |
|         |                           | R | GGCCAGAGGAGAAAGAGGAC    |
| Lypla1  | NM_008866                 | F | CCTTCACGGATTGGGAGATA    |
|         |                           | R | GGGGCATGTGGACAGATGTA    |
| Ostb    | NM_178933                 | F | AGAGAAAGCTGCAGCCAATG    |
|         |                           | R | CCAGGACCAGGATGGAATAA    |
| Slc10a1 | NM_011387                 | F | AGGGGGACATGAACCTCAG     |
|         |                           | R | TCCGTCTGATGATTCCTTTGC   |
| Slco1a1 | NM_013797                 | F | ACTCCCATAATGCCCTTGG     |
|         |                           | R | TAATCGGGCCAACAATCTTC    |
| Slco1b2 | NM_020495                 | F | ACCAAACCTCAGCATCCAAGC   |
|         |                           | R | TAGCTGAATGAGAGGGCTGC    |
| Tgfb1   | NM_011577                 | F | GGAGAGCCCTGGATACCAAC    |
|         |                           | R | CAACCCAGGTCCTTCCTAAA    |
| Tnfa    | NM_013693                 | F | CCACCACGCTCTTCTGTCTAC   |
|         |                           | R | AGGGTCTGGGCCATAGAACT    |

F, forward sequence; R, reverse sequence.

**Supplementary table 2. Top ten of serum ions that were significantly altered in mice treated with MCD diet for 2 weeks compared with in mice treated with MCS diet**

Increased ions

| Rank | RT (min) | Found (m/z) | Identity                        | Mass error (ppm) | Elemental Composition |
|------|----------|-------------|---------------------------------|------------------|-----------------------|
| 1    | 4.71     | 319.2271    | 12-Hydroxyeicosatetraenoic acid | 0.63             | C20H32O3              |
| 2    | 2.55     | 514.2843    | Tauro- $\beta$ -muricholate     | 0.97             | C26H45NO7S            |
| 3    | 2.92     | 514.2829    | Taurocholate                    | 1.75             | C26H45NO7S            |
| 4    | 5.97     | 279.2318    | Linoleic acid                   | 2.15             | C18H32O2              |
| 5    | 6.44     | 281.2474    | Oleic acid                      | 2.49             | C18H34O2              |
| 6    | 0.31     | 92.9297     | Not determined                  |                  |                       |
| 7    | 0.26     | 112.9862    | Not determined                  |                  |                       |
| 8    | 5.81     | 327.2319    | Docosahexaenoic acid            | 1.53             | C22H32O2              |
| 9    | 6.44     | 381.1738    | Not determined                  |                  |                       |
| 10   | 2.09     | 187.0977    | Azelaic acid                    | 3.74             | C9H16O4               |

Decreased ions

| Rank | RT (min) | Found (m/z) | Identity                      | Mass error (ppm) | Elemental Composition |
|------|----------|-------------|-------------------------------|------------------|-----------------------|
| 1    | 5.40     | 568.3615    | Stearoyl-LPC (18:0-LPC)       | 0.18             | C27H56NO9P            |
| 2    | 4.78     | 540.3303    | Palmitoyl-LPC (16:0-LPC)      | 0.37             | C25H52NO9P            |
| 3    | 4.94     | 566.3463    | Oleoyl-LPC (18:1-LPC)         | 0.88             | C27H54NO9P            |
| 4    | 4.53     | 612.3291    | Docosahexanoyl-LPC (22:6-LPC) | 1.63             | C31H52NO9P            |
| 5    | 4.57     | 564.3303    | Linoleoyl-LPC (18:2-LPC)      | 0.35             | C27H52NO9P            |
| 6    | 0.30     | 215.0321    | Not determined                |                  |                       |
| 7    | 4.57     | 588.3306    | Arachidonoyl-LPC (20:4-LPC)   | 0.85             | C29H52NO9P            |
| 8    | 4.54     | 500.2777    | Not determined                |                  |                       |
| 9    | 7.38     | 745.5478    | Not determined                |                  |                       |
| 10   | 4.40     | 538.3137    | Palmitoleoyl-LPC (16:1-LPC)   | 1.49             | C25H50NO9P            |

The ion ranking, based on OPLS analysis, shows the highest confidence and greatest contribution to separation between MCD and MCS diet treatment. RT, retention time; LPC, lysophosphatidylcholine.

**Supplementary figure 1. Histological and biochemical findings in mice with 8-week MCD diet treatment**

(A) Liver histology. Liver sections were stained by the hematoxylin and eosin (upper rows) and Sirius red methods (lower rows), respectively. Bars represent 100  $\mu\text{m}$  (upper row) and 200  $\mu\text{m}$  (lower row), respectively. CV, central vein.

(B) Serum levels of ALT and ALP and hepatic TG contents. Statistical analysis was performed using the two-tailed Student's *t*-test ( $n = 4$  in each group). \*,  $P < 0.05$ ; \*\*,  $P < 0.01$ .

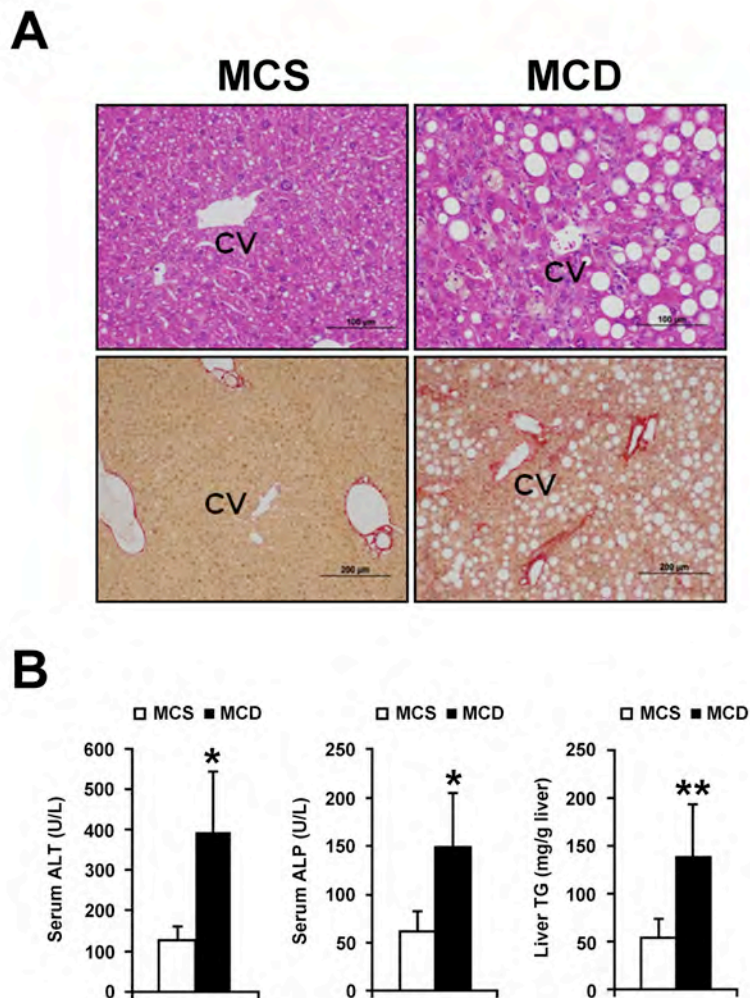

**Supplementary figure 2. Hepatic mRNA levels of genes associated with metabolism of LPC (A), bile acids (B) and 12-HETE (C) in mice with 2-week MCD diet treatment**

The mRNA levels were normalized to those of 18S ribosomal mRNA and subsequently normalized to those of MCS-treated mice. Statistical analysis was performed using the two-tailed Student's *t*-test (*n* = 4 in each group). \*, *P*<0.05; \*\*, *P*<0.01; \*\*\*, *P*<0.001; PC, phosphatidylcholine; GPC, glycerophosphocholine.

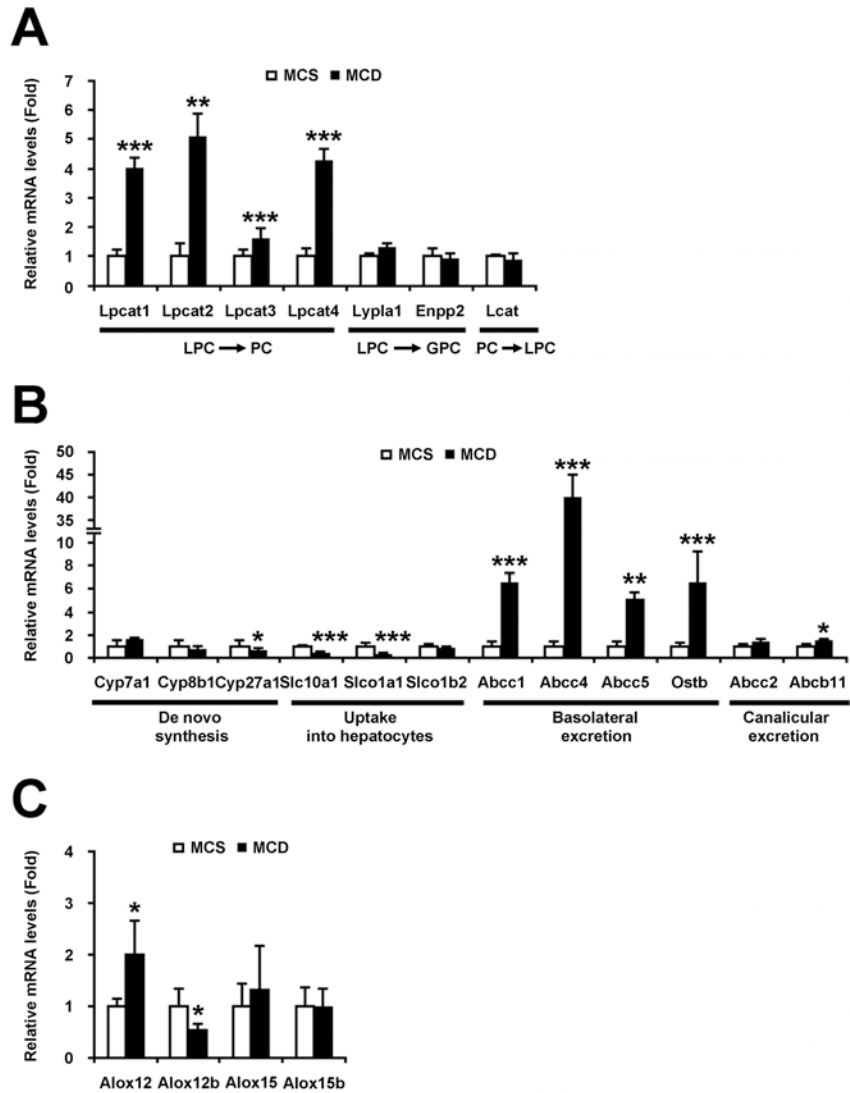

**Supplementary figure 3. Histological and biochemical findings in mice with 3-day, 1-week, and 2-week MCD diet treatment**

(A) Liver histology. Liver sections were stained by the hematoxylin and eosin method. Bars represent 100  $\mu\text{m}$ . CV, central vein.

(B) Serum levels of ALT and ALP and hepatic TG contents. Statistical analysis was performed using the two-tailed Student's *t*-test in the same treatment period ( $n = 5$  in each group). \*,  $P < 0.05$ ; \*\*,  $P < 0.01$ ; \*\*\*,  $P < 0.001$ .

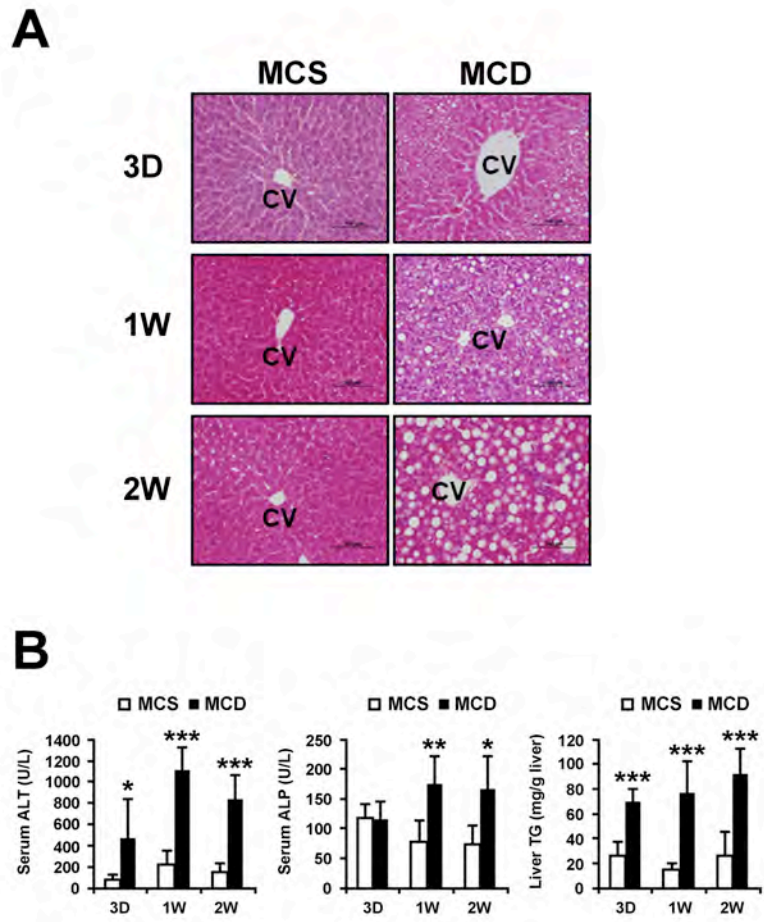

**Supplementary figure 4. Time course of serum metabolite concentrations (A) and mRNA levels of the related genes (B)**

In panel (A), the levels of LPC and 12-HETE were normalized to those of mice with 3-day MCS diet treatment and were expressed as relative abundance. In panel (B), the mRNA levels were normalized to those of 18S ribosomal mRNA and subsequently normalized to those of mice with 3-day MCS diet treatment. Statistical analysis was performed using the two-tailed Student's *t*-test in the same treatment period (n = 5 in each group). \*, *P*<0.05; \*\*, *P*<0.01; \*\*\*, *P*<0.001.

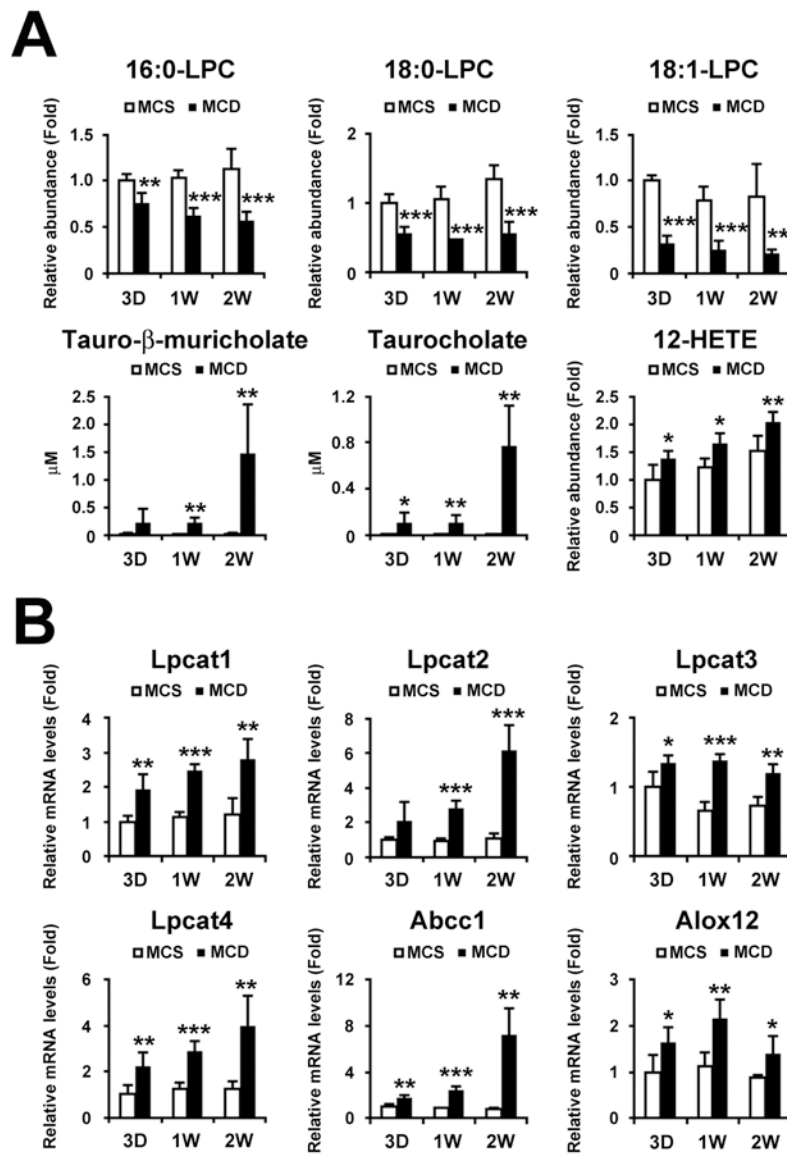

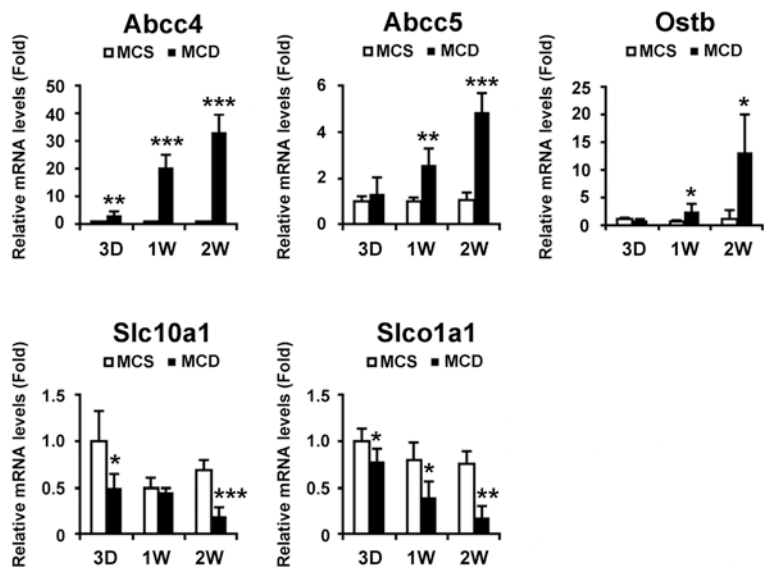



**Supplementary figure 5. Correlation between serum LPC, bile acids, and 12-HETE and the mRNA levels of the related genes.**

Data obtained from mice with MCD or MCS diet treatment for 3 days, 1 week, and 2 weeks were adopted (n = 30). Correlation coefficients were calculated by means of the Pearson's method.

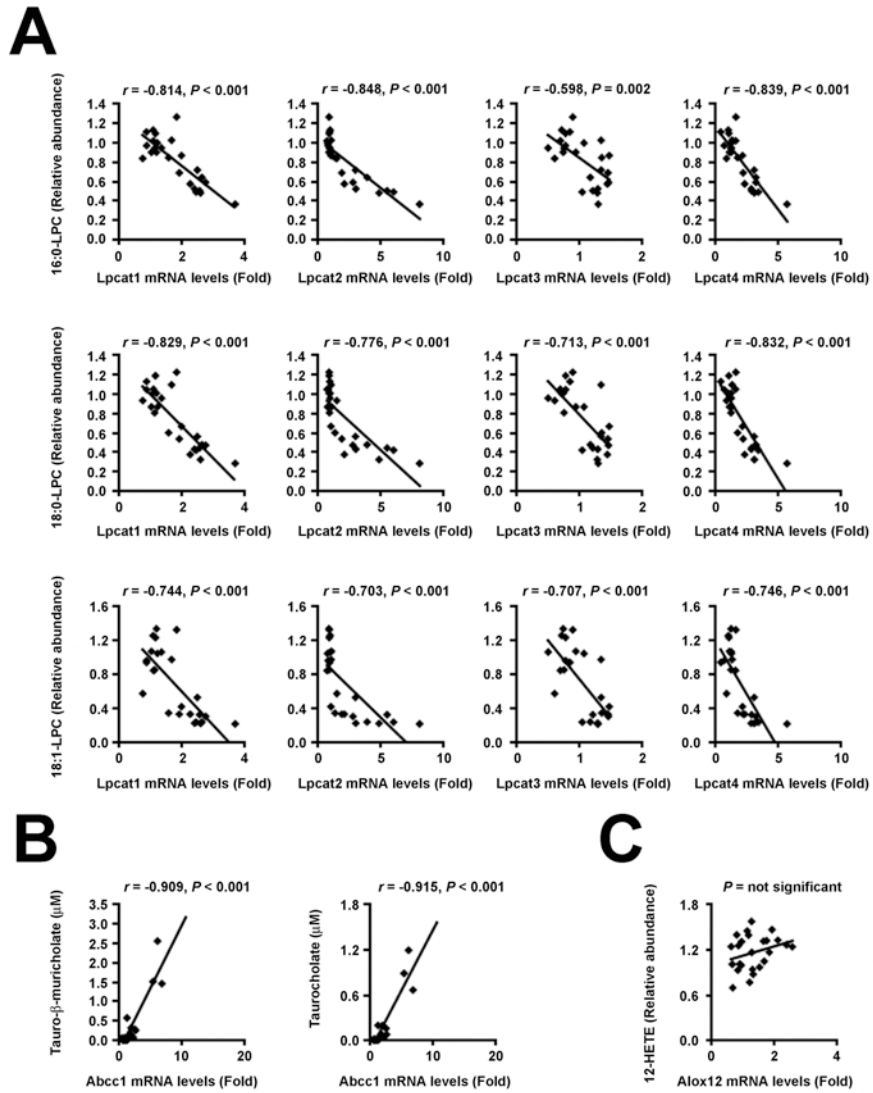

### Supplementary figure 6. Hepatic expression of pro-inflammatory cytokines in NASH

(A) The effect of methionine and choline supplementation to MCD diet treatment on the mRNA levels of pro-inflammatory cytokines. The mRNA levels were normalized to those of 18S ribosomal mRNA and subsequently normalized to those of MCS-treated mice. Statistical analysis was performed using the one-way ANOVA with Tukey's test (n = 5 in each group). \*,  $P < 0.05$ ; \*\*,  $P < 0.01$ ; \*\*\*,  $P < 0.001$ ; MD, methionine-deficient treatment; CD, choline-deficient treatment.

(B) Time course of the mRNA levels of pro-inflammatory cytokines. The mRNA levels were normalized to those of 18S ribosomal mRNA and subsequently normalized to those of mice with 3-day MCS diet treatment. Statistical analysis was performed using the two-tailed Student's *t*-test in the same treatment period (n = 5 in each group). \*,  $P < 0.05$ ; \*\*,  $P < 0.01$ ; \*\*\*,  $P < 0.001$ .

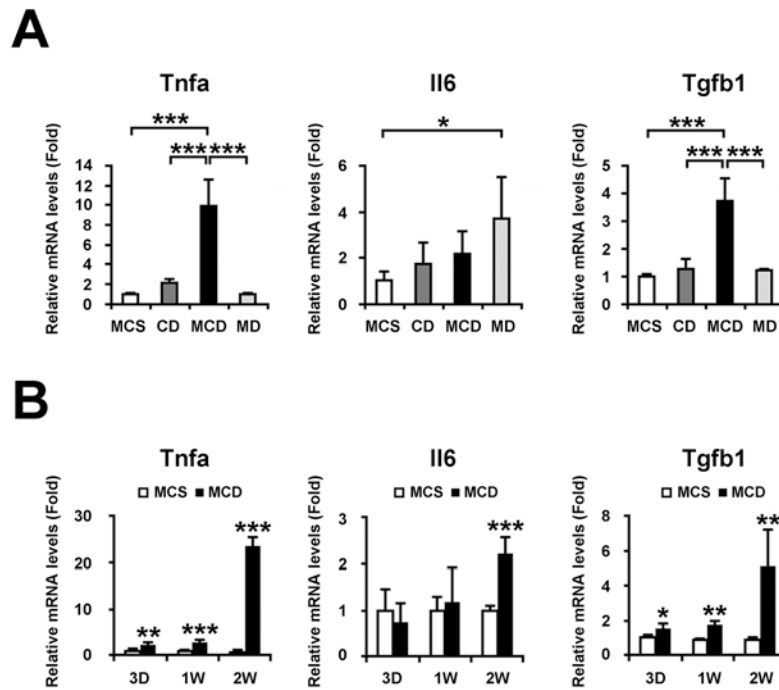

**Supplementary figure 7. Hepatic expression of NADPH oxidase 2 (Cybb) in NASH and the changes in the expression of Lpcats and bile acid transporters by H2O2 in primary hepatocytes**

(A) The effect of methionine and choline supplementation to MCD diet treatment on the Cybb mRNA levels. Statistical analysis was performed using the one-way ANOVA with Tukey's test (n = 5 in each group). \*\*\*,  $P < 0.001$ ; MD, methionine-deficient treatment; CD, choline-deficient treatment.

(B) Time course of the mRNA levels of Cybb. The mRNA levels were normalized to those of 18S ribosomal mRNA and subsequently normalized to those of mice with 3-day MCS diet treatment. Statistical analysis was performed using the two-tailed Student's *t*-test in the same treatment period (n = 5 in each group). \*,  $P < 0.05$ ; \*\*\*,  $P < 0.001$ .

(C) Primary hepatocytes were treated with H2O2 (100  $\mu$ M) for 1, 3, and 6 hours, respectively, and harvested to extract total RNA. The mRNA levels were normalized to those of 18S ribosomal mRNA and subsequently normalized to those of vehicle-treated hepatocytes in the same time point. Early growth response 1 (Egr1) mRNA levels were used as a positive control. Statistical analysis was performed using the two-tailed Student's *t*-test in the same period (n = 3 in each group). \*,  $P < 0.05$ ; \*\*,  $P < 0.01$ .

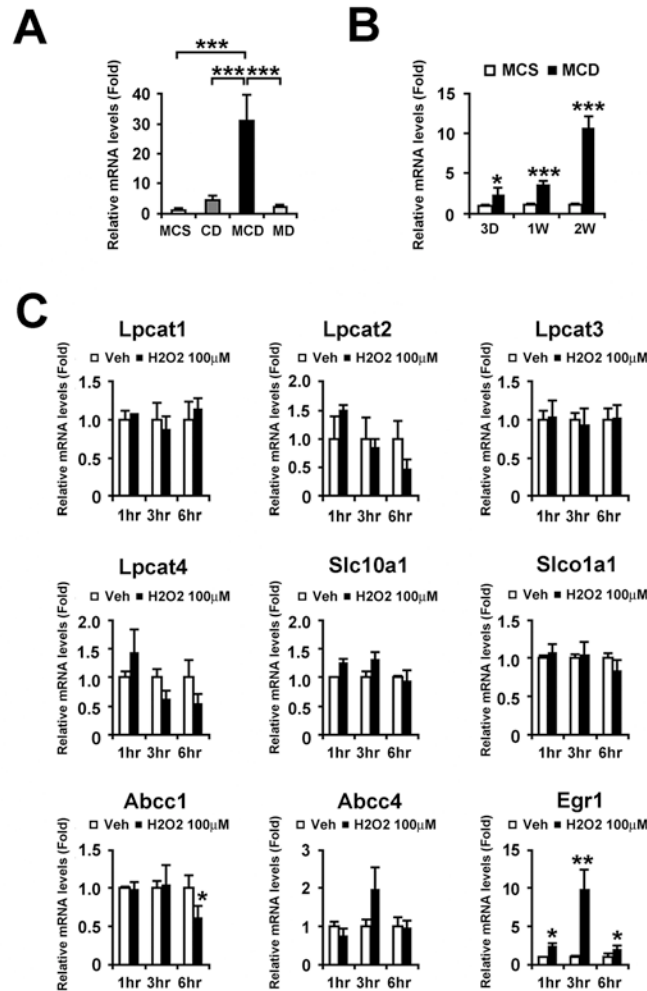

**Supplementary figure 8. Phenotypical changes in *ob/ob* mice with D-galactosamine (GalN) injection**

(A) Liver histology. Liver sections were stained by the hematoxylin and eosin method. Bars represent 100  $\mu$ m. WT, C57BL/6J wild-type mice.

(B and C) Serum ALT levels and hepatic mRNA levels of pro-inflammatory cytokines. Statistical analysis was performed using the one-way ANOVA with Tukey's test (n = 5 in each group). \*,  $P < 0.05$ ; \*\*,  $P < 0.01$ ; \*\*\*,  $P < 0.001$ .

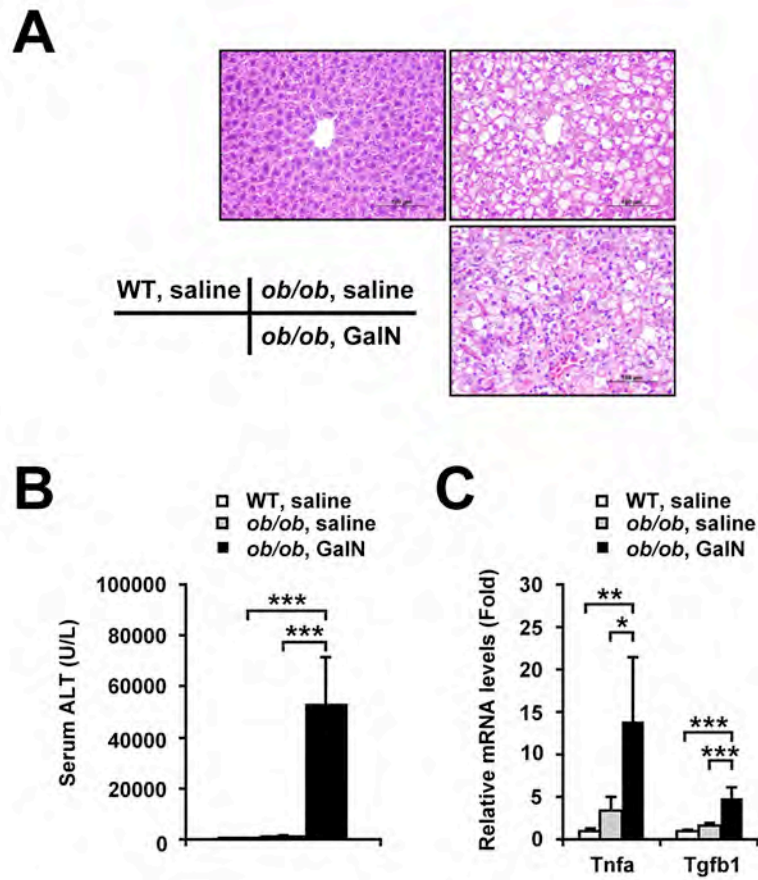

**Supplementary figure 9. Changes in serum metabolite concentrations (A) and mRNA levels of the related genes (B) in *ob/ob* mice with GalN injection**

In panel (A), serum levels of LPC were normalized to those of C57BL/6J wild-type (WT) mice with vehicle injection and were expressed as relative abundance. TMC $\beta$  and TC indicate tauro- $\beta$ -muricholate and taurocholate, respectively. In panel (B), the mRNA levels were normalized to those of 18S ribosomal mRNA and subsequently normalized to those of WT mice with vehicle injection. Statistical analysis was performed using the one-way ANOVA with Tukey's test (n = 5 in each group). \*,  $P < 0.05$ ; \*\*,  $P < 0.01$ ; \*\*\*,  $P < 0.001$ .

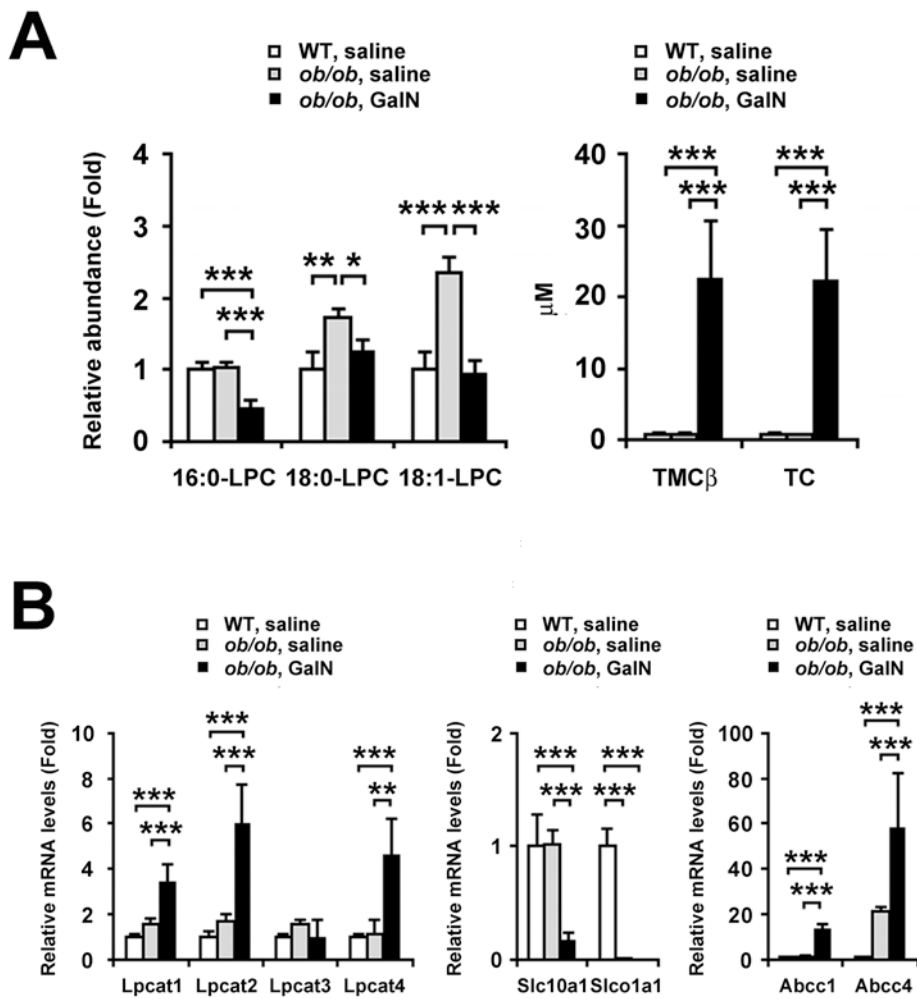

Supplement: NIHMS1000645-supplement-Supporting_information.pdf [file NIHMS1000645-supplement-Supporting_information.pdf]
